# Supplementary material for: Case-control meta-analysis of blood DNA methylation and autism spectrum disorder
Source: PubMed Central journal article supplement (PMC6022498; doi:10.1186/s13229-018-0224-6), 2018-06-28

**A**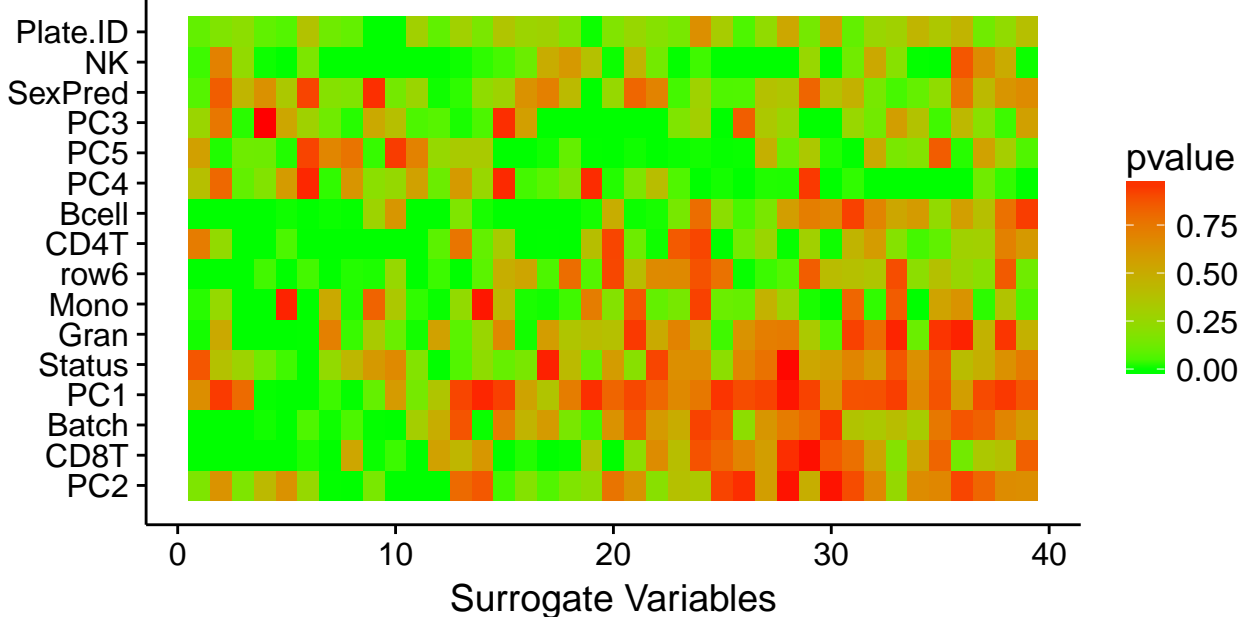**B**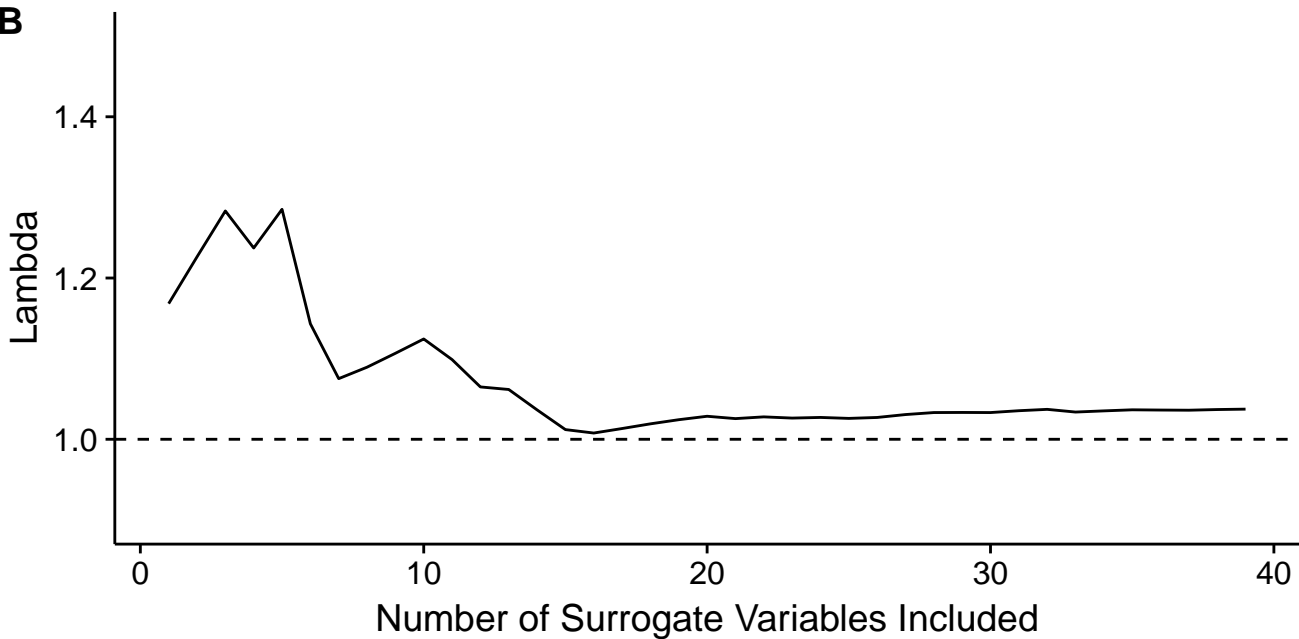

**A**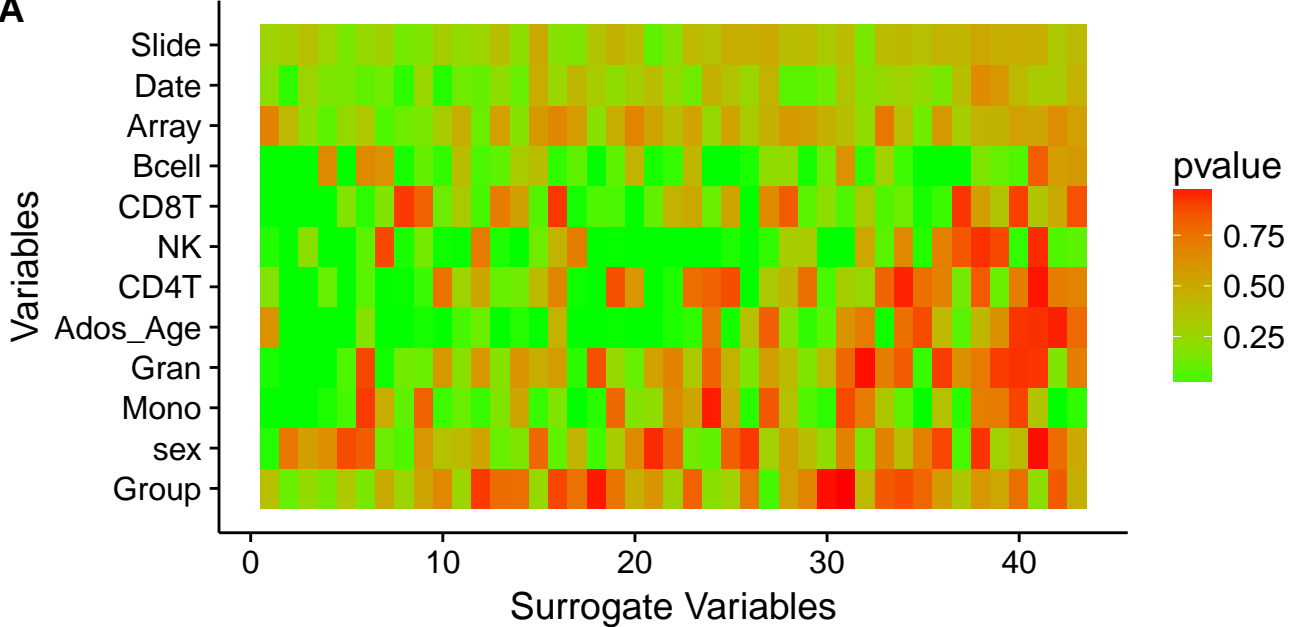**B**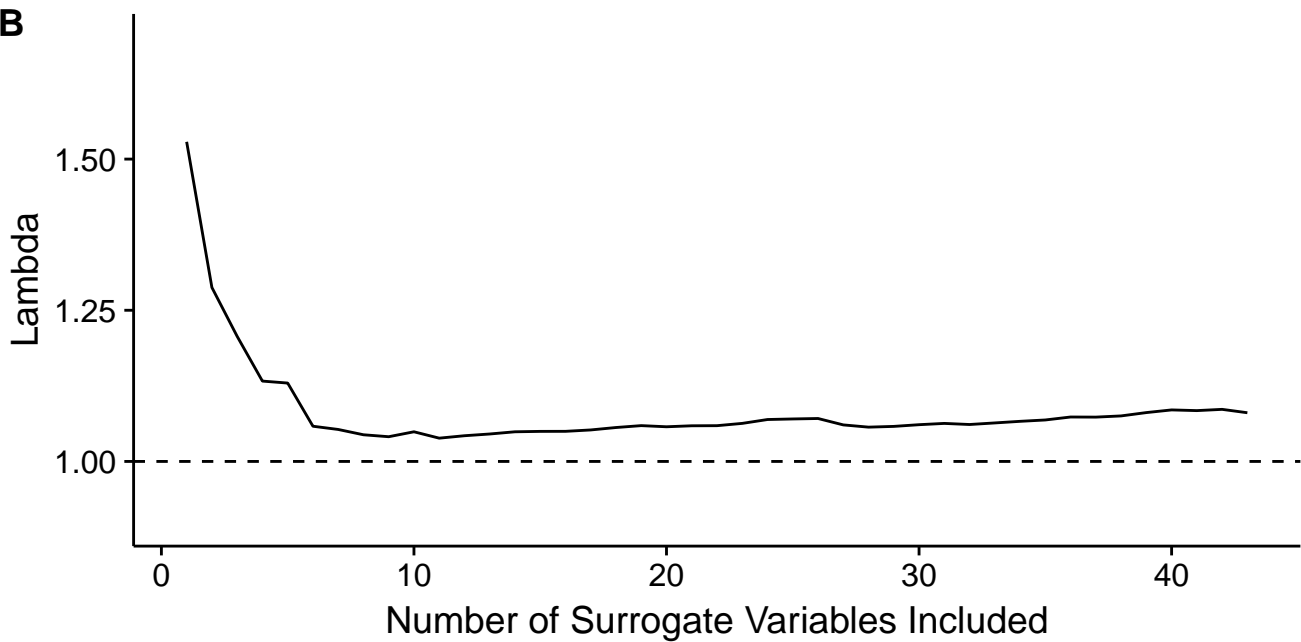

Supplement: 13229_2018_224_MOESM1_ESM.pdf [file 13229_2018_224_MOESM1_ESM.pdf]
